# Supplementary material for: Insights into the Evolution of a Snake Venom Multi-Gene Family from the Genomic Organization of Echis ocellatus SVMP Genes
Source: PubMed Central journal article supplement (PMC4963849; doi:10.3390/toxins8070216), 2016-07-12
Supplement: toxins-08-00216-s001.pdf [file toxins-08-00216-s001.pdf]

# Supplementary Materials: Insights into the Evolution of a Snake Venom Multi-Gene Family from the Genomic Organization of *Echis ocellatus* SVMP Genes

Libia Sanz and Juan J. Calvete

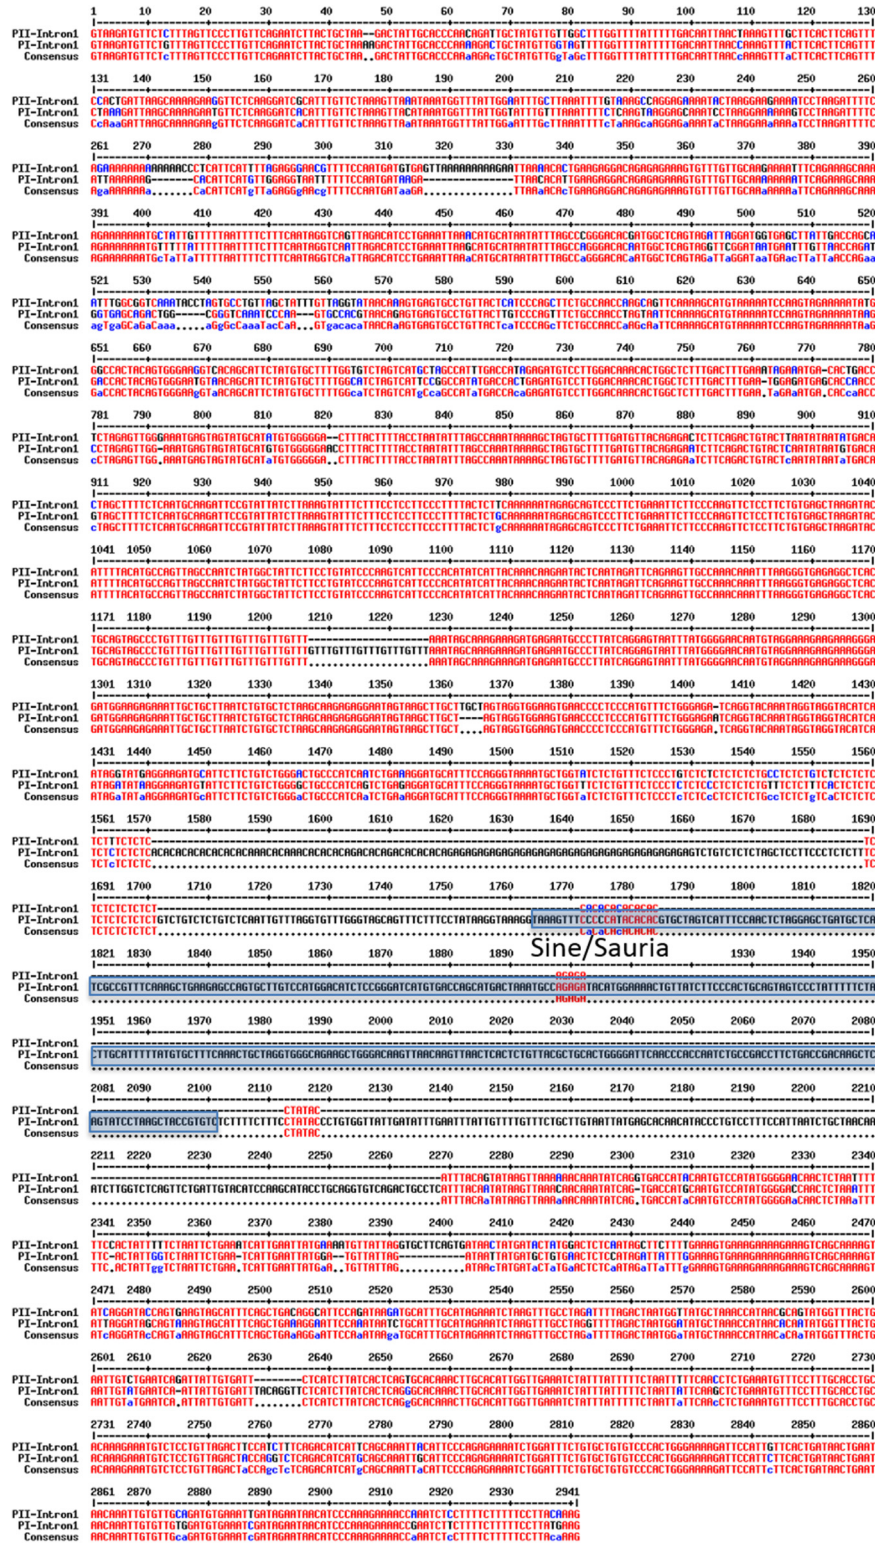

(A)

Intron2PII(864) 1 10 20 30 40 50 60 70 80 90 100 110 120 130  
Intron2PII Consensus  
131 140 150 160 170 180 190 200 210 220 230 240 250 260  
Intron2PII(864) 261 270 280 290 300 310 320 330 340 350 360 370 380 390  
Intron2PII(864) 391 400 410 420 430 440 450 460 470 480 490 500 510 520  
Intron2PII(864) 521 530 540 550 560 570 580 590 600 610 620 630 640 650  
Intron2PII(864) 651 660 670 680 690 700 710 720 730 740 750 760 770 780  
Intron2PII(864) 781 790 800 810 820 830 840 850 860 871  
Intron2PII(864) 871  
Intron2PII Consensus

(B)

1 10 20 30 40 50 60 70 80 90 100 110 120 130  
PI-Intron3  
PII-Intron3  
Consensus  
131 140 150 160 170 180 190 200 210 220 230 240 250 260  
PI-Intron3  
PII-Intron3  
Consensus  
261 270 280 290 300 310 320 330 340 350 360 370 380 390  
PI-Intron3  
PII-Intron3  
Consensus  
391 400 410 420 430 440 450 460 470 480 490 500 510 520  
PI-Intron3  
PII-Intron3  
Consensus  
521 530 540 550 560 570 580 590 600 610 620 630 640 650  
PI-Intron3  
PII-Intron3  
Consensus  
651 660 670 680 690 700 710 720 730 740 750 760 770 780  
PI-Intron3  
PII-Intron3  
Consensus  
781 790 800 810 820 830 840 850 860 870 880 890 900 910  
PI-Intron3  
PII-Intron3  
Consensus  
911 920 930 940 950 960 970 980 990 1000 1010 1020 1030 1040  
PI-Intron3  
PII-Intron3  
Consensus  
1041 1050 1060 1070 1080 1090 1100 1110 1120 1130 1140 1150 1160 1170  
PI-Intron3  
PII-Intron3  
Consensus  
1171 1180 1190 1200 1210 1220 1230 1240 1250 1260 1270 1280 1290 1300  
PI-Intron3  
PII-Intron3  
Consensus  
1301 1310 1320 1330 1340 1350 1360 1370 1380 1390 1400 1410 1420 1430  
PI-Intron3  
PII-Intron3  
Consensus  
1431 1440 1450 1460 1470 1480 1490 1500 1510 1520 1530 1540 1550 1560  
PI-Intron3  
PII-Intron3  
Consensus  
1561 1570 1580 1590 1600 1610 1620 1630 1640 1650 1660 1670 1680 1690  
PI-Intron3  
PII-Intron3  
Consensus  
1691 1700 1710 1720 1730 1740 1750 1760 1770 1780 1790 1800 1810 1820  
PI-Intron3  
PII-Intron3  
Consensus  
1821827  
PI-Intron3  
PII-Intron3  
Consensus

(C)



1 10 20 30 40 50 60 70 80 90 100 110 120 130  
 PII\_Intr04 GTAGGGTCTACCTTTATGAGCCTTTTTTAGGAGTAAATGAAACAAATGTTTGGCCACATATTACAAATACAGAAATGAGCCAGGCTACCAACAAAGTGTATATATATGAGATCTTT  
 PI\_Intr04 GTAGGGTCTACCTTTATGAGCCTTTTTTAGGAGTAAATGAAACAAATGTTTGGCCACATATTACAAATACAGAAATGAGCCAGGCTACCAACAAAGTGTATATATATGAGATCTTT  
 Consensus GTAGGGTCTACCTTTATGAGCCTTTTTTAGGAGTAAATGAAACAAATGTTTGGCCACATATTACAAATACAGAAATGAGCCAGGCTACCAACAAAGTGTATATATATGAGATCTTT

131 140 150 160 170 180 190 200 210 220 230 240 250 260  
 PII\_Intr04 ATATGATATGACACACAGGATGCTGGATGTTAAACCTGGTAAAGCCACATATTGGAGGTGAGTTCCACAAATGATTTATGAGAACATCAGGTTTGTAGATATATATATATAT  
 PI\_Intr04 ATATGATATGACACACAGGATGCTGGATGTTAAACCTGGTAAAGCCACATATTGGAGGTGAGTTCCACAAATGATTTATGAGAACATCAGGTTTGTAGATATATATATATAT  
 Consensus ATATGATATGACACACAGGATGCTGGATGTTAAACCTGGTAAAGCCACATATTGGAGGTGAGTTCCACAAATGATTTATGAGAACATCAGGTTTGTAGATATATATATATAT

261 270 280 290 300 310 320 330 340 350 360 370 380 390  
 PII\_Intr04 TAAACCGATACAGGATAAATGCAAGCTTTTAT...AATGATACAAATTCCTTGCCTATACAGAAATCATTATATCTTCATATAAATGGTCCCAAAATGGCTCTA  
 PI\_Intr04 TAAACCGATACAGGATAAATGCAAGCTTTTAT...AATGATACAAATTCCTTGCCTATACAGAAATCATTATATCTTCATATAAATGGTCCCAAAATGGCTCTA  
 Consensus TAAACCGATACAGGATAAATGCAAGCTTTTAT...AATGATACAAATTCCTTGCCTATACAGAAATCATTATATCTTCATATAAATGGTCCCAAAATGGCTCTA

391 400 410 420 430 440 450 460 470 480 490 500 510 520  
 PII\_Intr04 TCAGATGTAAGACATAGAGCTAATGCTCATGTTGGCCACCTCCAAATGATTTAAAGTGCATCTGTGCTATTTCGGTTTATATCTTCAGAGGTCACACAAATTTACTTTTGTG  
 PI\_Intr04 TCAGATGTAAGACATAGAGCTAATGCTCATGTTGGCCACCTCCAAATGATTTAAAGTGCATCTGTGCTATTTCGGTTTATATCTTCAGAGGTCACACAAATTTACTTTTGTG  
 Consensus TCAGATGTAAGACATAGAGCTAATGCTCATGTTGGCCACCTCCAAATGATTTAAAGTGCATCTGTGCTATTTCGGTTTATATCTTCAGAGGTCACACAAATTTACTTTTGTG

521 530 540 550 560 570 580 590 600 610 620 630 640 650  
 PII\_Intr04 TGATCTGAGGAGTCCCTGACGTGACTGATTTATGGAGACTGCATTTATCTATGTTCTTTGCACAAATCATTATAGAGGCTTCGGTTCTCTCAATCAAAATTTCTGGAAATTTCT  
 PI\_Intr04 TGATCTGAGGAGTCCCTGACGTGACTGATTTATGGAGACTGCATTTATCTATGTTCTTTGCACAAATCATTATAGAGGCTTCGGTTCTCTCAATCAAAATTTCTGGAAATTTCT  
 Consensus TGATCTGAGGAGTCCCTGACGTGACTGATTTATGGAGACTGCATTTATCTATGTTCTTTGCACAAATCATTATAGAGGCTTCGGTTCTCTCAATCAAAATTTCTGGAAATTTCT

651 660 670 680 690 700 710 720 730 740 750 758  
 PII\_Intr04 GCTAATATTTATGATGTTTGGAAATCATTGAACTGACTCTCTCTCAATCAAAATCAAAACAGCTTTACCCAGTGTAGCTCTTGCCTCCCTACAG  
 PI\_Intr04 GCTAATATTTATGATGTTTGGAAATCATTGAACTGACTCTCTCTCAATCAAAATCAAAACAGCTTTACCCAGTGTAGCTCTTGCCTCCCTACAG  
 Consensus GCTAATATTTATGATGTTTGGAAATCATTGAACTGACTCTCTCTCAATCAAAATCAAAACAGCTTTACCCAGTGTAGCTCTTGCCTCCCTACAG

(D)

1 10 20 30 40 50 60 70 80 90 100 110 120 130  
 PII\_Intr05 GTAGATAGCTCTAATCTTTATTTGTTATATATATATATAGTCTTGGACTCAATTTAAATGAGGACATCCAGTTTTCATGAAATATAGTGGGTGATCCAGGATTCGGCA  
 PI\_Intr05 GTAGATAGCTCTAATCTTTATTTGTTATATATATATATATAGTCTTGGACTCAATTTAAATGAGGACATCCAGTTTTCATGAAATATAGTGGGTGATCCAGGATTCGGCA  
 Consensus GTAGATAGCTCTAATCTTTATTTGTTATATATATATATATAGTCTTGGACTCAATTTAAATGAGGACATCCAGTTTTCATGAAATATAGTGGGTGATCCAGGATTCGGCA

131 140 150 160 170 180 190 200 210 220 230 240 250 260  
 PII\_Intr05 GATTTAGACATACCTTTGGTTAAACCCAGAGAGGCTGCCCGCCAGGAAAGAAATCTGGACATCAATCAATGCTAAAGGACATCCAGGCTCCCTCCCTCCAGGCTGGGATGAT  
 PI\_Intr05 GATTTAGACATACCTTTGGTTAAACCCAGAGAGGCTGCCCGCCAGGAAAGAAATCTGGACATCAATCAATGCTAAAGGACATCCAGGCTCCCTCCCTCCAGGCTGGGATGAT  
 Consensus GATTTAGACATACCTTTGGTTAAACCCAGAGAGGCTGCCCGCCAGGAAAGAAATCTGGACATCAATCAATGCTAAAGGACATCCAGGCTCCCTCCCTCCAGGCTGGGATGAT

261 270 280 290 300 310 320 330 340 350 360 370 380 390  
 PII\_Intr05 TACAGATAGAGGATAGTAGGTTCAATTTGGAGACTTCTAGAAATGACAGAGAGGACAGAGTTCCAGTCTACCCAGAAACATTTCTGAGTCACTTGCACACTTCTCCAGCACT  
 PI\_Intr05 TACAGATAGAGGATAGTAGGTTCAATTTGGAGACTTCTAGAAATGACAGAGAGGACAGAGTTCCAGTCTACCCAGAAACATTTCTGAGTCACTTGCACACTTCTCCAGCACT  
 Consensus TACAGATAGAGGATAGTAGGTTCAATTTGGAGACTTCTAGAAATGACAGAGAGGACAGAGTTCCAGTCTACCCAGAAACATTTCTGAGTCACTTGCACACTTCTCCAGCACT

391 400 410 420 430 440 450 460 470 480 490 500 510 520  
 PII\_Intr05 AGATATGTTACTTACATAGAGATCCCGAATTCAGAGGCTCTCTCAATGATAGAGATGACATCACTCAACATTTTACGAAAGAACACAGAACTCACCCTTGGACAGAGCTGTGCTCATG  
 PI\_Intr05 AGATATGTTACTTACATAGAGATCCCGAATTCAGAGGCTCTCTCAATGATAGAGATGACATCACTCAACATTTTACGAAAGAACACAGAACTCACCCTTGGACAGAGCTGTGCTCATG  
 Consensus AGATATGTTACTTACATAGAGATCCCGAATTCAGAGGCTCTCTCAATGATAGAGATGACATCACTCAACATTTTACGAAAGAACACAGAACTCACCCTTGGACAGAGCTGTGCTCATG

521 530 540 550 560 570 580 590 600 610 620 630 640 650  
 PII\_Intr05 GATCGAGAAATTAAGAGCTGAAACAGAGAGATACACAGAAATTAAGGAAAGACAGATGACAGAAATAGCATGAGAGGAGCTTTGAGTCTTCTAGTCAACTCTCTCCAGTA  
 PI\_Intr05 GATCGAGAAATTAAGAGCTGAAACAGAGAGATACACAGAAATTAAGGAAAGACAGATGACAGAAATAGCATGAGAGGAGCTTTGAGTCTTCTAGTCAACTCTCTCCAGTA  
 Consensus GATCGAGAAATTAAGAGCTGAAACAGAGAGATACACAGAAATTAAGGAAAGACAGATGACAGAAATAGCATGAGAGGAGCTTTGAGTCTTCTAGTCAACTCTCTCCAGTA

651 660 670 680 690 700 710 720 730 740 750 760 770 780  
 PII\_Intr05 GAGAGCTATATCTCTAGACAAATAGCTCAATCTCTTAAAGACAGTAGTGGACACCCCAATGCTGATAGGTTAATTTGCCATTTGTGAAATATTTACTTACTTACTCTA  
 PI\_Intr05 GAGAGCTATATCTCTAGACAAATAGCTCAATCTCTTAAAGACAGTAGTGGACACCCCAATGCTGATAGGTTAATTTGCCATTTGTGAAATATTTACTTACTTACTCTA  
 Consensus GAGAGCTATATCTCTAGACAAATAGCTCAATCTCTTAAAGACAGTAGTGGACACCCCAATGCTGATAGGTTAATTTGCCATTTGTGAAATATTTACTTACTTACTCTA

781 790 800 810 820 830 840 850 860 870 880 890 900 910  
 PII\_Intr05 TTTCTCTTTGGTACTTCCAGGATGCTCTCTCTCCGATCAGTAAAGATAGGTTCCCAATTTTATGACAGCTCTTAATCTTAAGATATCAGTACTCTACCCCTCTG  
 PI\_Intr05 TTTCTCTTTGGTACTTCCAGGATGCTCTCTCTCCGATCAGTAAAGATAGGTTCCCAATTTTATGACAGCTCTTAATCTTAAGATATCAGTACTCTACCCCTCTG  
 Consensus TTTCTCTTTGGTACTTCCAGGATGCTCTCTCTCCGATCAGTAAAGATAGGTTCCCAATTTTATGACAGCTCTTAATCTTAAGATATCAGTACTCTACCCCTCTG

911 920 930 940 950 960 970 980 990 1000 1010 1020 1030 1040  
 PII\_Intr05 TCACTAGCATGATATCACTTGTGACACCTTCAACCTCCAGTATGATGATCTTATCTTCAATGTTACTCCCTGTTGTTGCTGATGACTCTCTATGA...GATGCTCCAGAAAT...C  
 PI\_Intr05 TCACTAGCATGATATCACTTGTGACACCTTCAACCTCCAGTATGATGATCTTATCTTCAATGTTACTCCCTGTTGTTGCTGATGACTCTCTATGA...GATGCTCCAGAAAT...C  
 Consensus TCACTAGCATGATATCACTTGTGACACCTTCAACCTCCAGTATGATGATCTTATCTTCAATGTTACTCCCTGTTGTTGCTGATGACTCTCTATGA...GATGCTCCAGAAAT...C

1041 1050 1060 1070 1080 1090 1100 1110 1120 1130 1140 1150 1160 1170  
 PII\_Intr05 TA...TTTCAATTTAT...AATATCTCTG...TCAT...TACT...ATCT...AATGCTATCAACTTACTGATTTATCTTACCCAGCAAAATTTGTTACTTCTTTAAGATATAGCAT  
 PI\_Intr05 TA...TTTCAATTTAT...AATATCTCTG...TCAT...TACT...ATCT...AATGCTATCAACTTACTGATTTATCTTACCCAGCAAAATTTGTTACTTCTTTAAGATATAGCAT  
 Consensus TA...TTTCAATTTAT...AATATCTCTG...TCAT...TACT...ATCT...AATGCTATCAACTTACTGATTTATCTTACCCAGCAAAATTTGTTACTTCTTTAAGATATAGCAT

1171 1180 1190 1200 1210 1220 1230 1240 1250 1260 1270 1280 1290 1300  
 PII\_Intr05 ATACATATACCTTTTATGATATTTAGCAGTATATTTCTTTTTATCTACTAGTGTGATTTCTGAGCTTATCAGTATATATGATAAATATAGATATTTACCTTATGAAATAA  
 PI\_Intr05 ATACATATACCTTTTATGATATTTAGCAGTATATTTCTTTTTATCTACTAGTGTGATTTCTGAGCTTATCAGTATATATGATAAATATAGATATTTACCTTATGAAATAA  
 Consensus ATACATATACCTTTTATGATATTTAGCAGTATATTTCTTTTTATCTACTAGTGTGATTTCTGAGCTTATCAGTATATATGATAAATATAGATATTTACCTTATGAAATAA

1301 1310 1320 1330 1340 1350 1360 1370 1380 1390 1400 1410 1420 1430  
 PII\_Intr05 GTTTTACACAGCAGATGTTACAAATGGCTTTAGTGTGATTTAGTACTAGAACTTTATTTTACATCTGGAAATACAAATTTGGTTCATGCCAAATATCCACACAAACGTA  
 PI\_Intr05 GTTTTACACAGCAGATGTTACAAATGGCTTTAGTGTGATTTAGTACTAGAACTTTATTTTACATCTGGAAATACAAATTTGGTTCATGCCAAATATCCACACAAACGTA  
 Consensus GTTTTACACAGCAGATGTTACAAATGGCTTTAGTGTGATTTAGTACTAGAACTTTATTTTACATCTGGAAATACAAATTTGGTTCATGCCAAATATCCACACAAACGTA

1431 1440 1450 1460 1470 1480 1490 1500 1510 1520 1530 1540 1550 1560  
 PII\_Intr05 CACCTATTGTGGCTGCACAGTTTGGAAATCTCTCATCTTTCTGATCACTGCATCTATGAAAGATGAAAGGATGTTGAGTCTGAGGAAAGATTAAGATATCACTCATGTTAA  
 PI\_Intr05 CACCTATTGTGGCTGCACAGTTTGGAAATCTCTCATCTTTCTGATCACTGCATCTATGAAAGATGAAAGGATGTTGAGTCTGAGGAAAGATTAAGATATCACTCATGTTAA  
 Consensus CACCTATTGTGGCTGCACAGTTTGGAAATCTCTCATCTTTCTGATCACTGCATCTATGAAAGATGAAAGGATGTTGAGTCTGAGGAAAGATTAAGATATCACTCATGTTAA

1561 1570 1580 1590 1600 1610 1620 1630 1640 1650 1660 1670 1680 1690  
 PII\_Intr05 GAGGAAATCAAAACATGAGGTAGTGAATGGCTCAGAGCCAGTTTCAATACCCACTAGTAACTCATCAGTGCAGTTTCTGCACTAACAATTTCTTCTTGGCTTCCACT  
 PI\_Intr05 GAGGAAATCAAAACATGAGGTAGTGAATGGCTCAGAGCCAGTTTCAATACCCACTAGTAACTCATCAGTGCAGTTTCTGCACTAACAATTTCTTCTTGGCTTCCACT  
 Consensus GAGGAAATCAAAACATGAGGTAGTGAATGGCTCAGAGCCAGTTTCAATACCCACTAGTAACTCATCAGTGCAGTTTCTGCACTAACAATTTCTTCTTGGCTTCCACT

1691 1700 1710 1719  
 PII\_Intr05 CTGATCATCTTTTCAATGTTTACAG  
 PI\_Intr05 CTGATCATCTTTTCAATGTTTACAG  
 Consensus CTGATCATCTTTTCAATGTTTACAG

(E)







1 10 20 30 40 50 60 70 80 90 100 110 120 130  
 PII\_Intro10 GTTAGAGAAAGGATCTTATATCTATTGTCACAGTCAGGCTTACATACAGACAAACATCTTTTCARATAGAGTCTCTTCTATTTTGGCCACGTCATTTTCACCCATTTATTTCGAG  
 PII\_Intro10 GTTAGAGAAAGGATCTTATATCTATTGTCACAGTCAGGCTTACATACAGACAAACATCTTTTCARATAGAGTCTCTTCTATTTTGGCCACGTCATTTTCACCCATTTATTTCGAG  
 Consensus GTTAGAGAAAGGATCTTATATCTATTGTCACAGTCAGGCTTACATACAGACAAACATCTTTTCARATAGAGTCTCTTCTATTTTGGCCACGTCATTTTCACCCATTTATTTCGAG

131 140 150 160 170 180 190 200 210 220 230 240 250 260  
 PII\_Intro10 ATTTGACATCTCCAGGCTCGCGTCAACTGATGGCATTTGACACAGTGCATCTAGACACAGCTTTTATGACATGAGCTATATGTCAGGATGAGATATATATATGTTATGGTTCAGTCARA  
 PII\_Intro10 ATTTGACATCTCCAGGCTCGCGTCAACTGATGGCATTTGACACAGTGCATCTAGACACAGCTTTTATGACATGAGCTATATGTCAGGATGAGATATATATATGTTATGGTTCAGTCARA  
 Consensus ATTTGACATCTCCAGGCTCGCGTCAACTGATGGCATTTGACACAGTGCATCTAGACACAGCTTTTATGACATGAGCTATATGTCAGGATGAGATATATATATGTTATGGTTCAGTCARA

261 270 280 290 300 310 320 330 340 350 360 370 380 390  
 PII\_Intro10 CTGACTCTGATGGCAATGACAGGTCARAGCATGTTACACACTTCCAAATATGCTTCTGACATAGTCTTAGCATCCARAGACAAACATGATTCATCCAGAAATTAGTGCTAGATGG  
 PII\_Intro10 CTGACTCTGATGGCAATGACAGGTCARAGCATGTTACACACTTCCAAATATGCTTCTGACATAGTCTTAGCATCCARAGACAAACATGATTCATCCAGAAATTAGTGCTAGATGG  
 Consensus CTGACTCTGATGGCAATGACAGGTCARAGCATGTTACACACTTCCAAATATGCTTCTGACATAGTCTTAGCATCCARAGACAAACATGATTCATCCAGAAATTAGTGCTAGATGG

391 400 410 420 430 440 450 460 470 480 490 500 510 520  
 PII\_Intro10 CATATGATGATCTAGTACATGAGAAACAAABAATCTAAATCTACAAAGAAABAABACCTCTAGTATTTAGAAABCCATATTAGTAGG-TGATGCTATGATTTAGGAAAGAG  
 PII\_Intro10 CATATGATGATCTAGTACATGAGAAACAAABAATCTAAATCTACAAAGAAABAABACCTCTAGTATTTAGAAABCCATATTAGTAGG-TGATGCTATGATTTAGGAAAGAG  
 Consensus CATATGATGATCTAGTACATGAGAAACAAABAATCTAAATCTACAAAGAAABAABACCTCTAGTATTTAGAAABCCATATTAGTAGG-TGATGCTATGATTTAGGAAAGAG

521 530 540 550 560 570 580 590 600 610 620 630 640 650  
 PII\_Intro10 TAACTAGCTTTTGTTCACATGAAAGATGGAGACATGGTAAACAAAGCTATACACAAACCTAATAGTTTGTCTTATAGCAGATAGATCTGGTAGTAGGACTCAT  
 PII\_Intro10 TAACTAGCTTTTGTTCACATGAAAGATGGAGACATGGTAAACAAAGCTATACACAAACCTAATAGTTTGTCTTATAGCAGATAGATCTGGTAGTAGGACTCAT  
 Consensus TAACTAGCTTTTGTTCACATGAAAGATGGAGACATGGTAAACAAAGCTATACACAAACCTAATAGTTTGTCTTATAGCAGATAGATCTGGTAGTAGGACTCAT

651 660 670 680 690 700 710 720 730 740 750 760 770 780  
 PII\_Intro10 AAGCTACTGCTCAGAGGTTATTTATCAGAAAGACACTCATCT- AAGCTCTGTTAGGATGGTACCTTCATATCTGAAATGCAAGATGAGCAGAGGACACTGATGATTTTTTTTGA  
 PII\_Intro10 AAGCTACTGCTCAGAGGTTATTTATCAGAAAGACACTCATCT- AAGCTCTGTTAGGATGGTACCTTCATATCTGAAATGCAAGATGAGCAGAGGACACTGATGATTTTTTTTGA  
 Consensus AAGCTACTGCTCAGAGGTTATTTATCAGAAAGACACTCATCT- AAGCTCTGTTAGGATGGTACCTTCATATCTGAAATGCAAGATGAGCAGAGGACACTGATGATTTTTTTTGA

781 790 800 810 820 830 840 850 860 870 880 890 900 910  
 PII\_Intro10 CTGAGGTTTCTGATGTCAGGCTGTCARACTCAATTTGATGGGCTCAGATCAGATTGCGGTTGCCCTCAGGGGGTGGTGGGTTGGCCAGGGTGGCCACAGCCACAGGATGGTGAATGT  
 PII\_Intro10 CTGAGGTTTCTGATGTCAGGCTGTCARACTCAATTTGATGGGCTCAGATCAGATTGCGGTTGCCCTCAGGGGGTGGTGGGTTGGCCAGGGTGGCCACAGCCACAGGATGGTGAATGT  
 Consensus CTGAGGTTTCTGATGTCAGGCTGTCARACTCAATTTGATGGGCTCAGATCAGATTGCGGTTGCCCTCAGGGGGTGGTGGGTTGGCCAGGGTGGCCACAGCCACAGGATGGTGAATGT

911 920 930 940 950 960 970 980 990 1000 1010 1020 1030 1040  
 PII\_Intro10 ATATGCTAGCTTTAGTACTGATAGTGCAGACAGCAATGGATGATACATTTTGTCTTATCTGTCGTAGCTTCTGG-CTGTAAGTTTCTCTGAGATGATTTGATGATGTTCTGGAGTC  
 PII\_Intro10 ATATGCTAGCTTTAGTACTGATAGTGCAGACAGCAATGGATGATACATTTTGTCTTATCTGTCGTAGCTTCTGG-CTGTAAGTTTCTCTGAGATGATTTGATGATGTTCTGGAGTC  
 Consensus ATATGCTAGCTTTAGTACTGATAGTGCAGACAGCAATGGATGATACATTTTGTCTTATCTGTCGTAGCTTCTGG-CTGTAAGTTTCTCTGAGATGATTTGATGATGTTCTGGAGTC

1041 1050 1060 1070 1080 1090 1100 1110 1120 1130 1140 1150 1160 1170  
 PII\_Intro10 TTGGTGGCAGACTTTCAGAGGACTAGAGATCTGAGATGATCTCAGCTAATAATGGTCACTTGGTCCAGTTTAGCCACTTAGGTTATATATATGGATCCTTTTACGTTTCT  
 PII\_Intro10 TTGGTGGCAGACTTTCAGAGGACTAGAGATCTGAGATGATCTCAGCTAATAATGGTCACTTGGTCCAGTTTAGCCACTTAGGTTATATATATGGATCCTTTTACGTTTCT  
 Consensus TTGGTGGCAGACTTTCAGAGGACTAGAGATCTGAGATGATCTCAGCTAATAATGGTCACTTGGTCCAGTTTAGCCACTTAGGTTATATATATGGATCCTTTTACGTTTCT

1171 1180 1190 1200 1210  
 PII\_Intro10 TGCCAGATACAAATAAAAGATATCTTATTTCTCAG  
 PII\_Intro10 TGCCAGATACAAATAAAAGATATCTTATTTCTCAG  
 Consensus TGCCAGATACAAATAAAAGATATCTTATTTCTCAG

(J)



1 10 20 30 40 50 60 70 80 90 100 110 120 130  
 Intron1PII  
 Intron1PII  
 Consensus  
 131 140 150 160 170 180 190 200 210 220 230 240 250 260  
 Intron1PII  
 Intron1PII  
 Consensus  
 261 270 280 290 300 310 320 330 340 350 360 370 380 390  
 Intron1PII  
 Intron1PII  
 Consensus  
 391 400 410 420 430 440 450 460 470 480 490 500 510 520  
 Intron1PII  
 Intron1PII  
 Consensus  
 521 530 540 550 560 570 580 590 600 610 620 630 640 650  
 Intron1PII  
 Intron1PII  
 Consensus  
 651 660 670 680 690 700 710 720 730 740 750 760 770 780  
 Intron1PII  
 Intron1PII  
 Consensus  
 781 790 800 810 820 830 840 850 860 870 880 890 900 910  
 Intron1PII  
 Intron1PII  
 Consensus  
 911 920 930 940 950 960 970 980 990 1000 1010 1020 1030 1040  
 Intron1PII  
 Intron1PII  
 Consensus  
 1041 1050 1060 1070 1080 1090 1100 1110 1120 1130 1140 1150 1160 1170  
 Intron1PII  
 Intron1PII  
 Consensus  
 1171 1180 1190 1200 1210 1220 1230 1240 1250 1260 1270 1280 1290 1300  
 Intron1PII  
 Intron1PII  
 Consensus  
 1301 1310 1320 1330 1340 1350 1360 1370 1380 1390 1400 1410 1420 1430  
 Intron1PII  
 Intron1PII  
 Consensus  
 1431 1440 1450 1460 1470 1480 1490 1500 1510 1520 1530 1540 1550 1560  
 Intron1PII  
 Intron1PII  
 Consensus  
 1561 1570 1580 1590 1600 1610 1620 1630 1640 1650 1660 1670 1680 1690  
 Intron1PII  
 Intron1PII  
 Consensus  
 1691 1700 1710 1720 1730 1740 1750 1760 1770 1780 1790 1800 1810 1820  
 Intron1PII  
 Intron1PII  
 Consensus  
 1821 1830 1840 1850 1860 1870 1880 1890 1900 1910 1920 1930 1940 1950  
 Intron1PII  
 Intron1PII  
 Consensus  
 1951 1960 1970 1980 1990 2000 2010 2020 2030 2040 2050 2060 2070 2080  
 Intron1PII  
 Intron1PII  
 Consensus  
 2081 2090 2100 2110 2120 2130 2140 2150 2160 2170 2180 2190 2200 2210  
 Intron1PII  
 Intron1PII  
 Consensus  
 2211 2220 2230 2240 2250 2260 2270 2280 2290 2300 2310 2320 2330 2340  
 Intron1PII  
 Intron1PII  
 Consensus  
 2341 2350 2360 2370 2380 2390 2400 2410 2420 2430 2440 2450 2460 2470  
 Intron1PII  
 Intron1PII  
 Consensus  
 2471 2480 2490 2500 2510 2520 2530 2540 2550 2560 2570 2580 2590 2600  
 Intron1PII  
 Intron1PII  
 Consensus  
 2601 2610 2620 2630 2640 2650 2660 2670 2680 2690 2700 2710 2720 2730  
 Intron1PII  
 Intron1PII  
 Consensus  
 2731 2740 2750 2760 2770 2780 2790 2800 2810 2820 2830 2840 2850 2860  
 Intron1PII  
 Intron1PII  
 Consensus  
 2861 2870 2880 2890 2900 2910 2920 2930 2940 2950 2960 2970 2980 2990  
 Intron1PII  
 Intron1PII  
 Consensus  
 2991 3000 3010 3020 3030 3040 3050 3060 3070 3080 3090 3100 3110 3120  
 Intron1PII  
 Intron1PII  
 Consensus  
 3121 3130 3140 3150 3160 3170 3180 3190 3200 3210 3220 3230 3240 3250  
 Intron1PII  
 Intron1PII  
 Consensus  
 3251 3260 3270 3280 3290 3300 3310 3320 3330 3340 3350 3360 3370 3380  
 Intron1PII  
 Intron1PII  
 Consensus  
 3383387  
 Intron1PII  
 Intron1PII  
 Consensus

(K)

1 10 20 30 40 50 60 70 80 90 100 110 120 130  
PII-Intron12  
PI-Intron12  
Consensus  
131 140 150 160 170 180 190 200 210 220 230 240 250 260  
PII-Intron12  
PI-Intron12  
Consensus  
261 270 280 290 300 310 320 330 340 350 360 370 380 390  
PII-Intron12  
PI-Intron12  
Consensus  
391 400 410 420 430 440 450 460 470 480 490 500 510 520  
PII-Intron12  
PI-Intron12  
Consensus  
521 530 540 550 560 570 580 590 600 610 620 630 640 650  
PII-Intron12  
PI-Intron12  
Consensus  
651 660 670 680 690 700 710 720 730 740 750 760 770 780  
PII-Intron12  
PI-Intron12  
Consensus  
781 790 800 810 820 830 840 850 860 870 880 890 900 910  
PII-Intron12  
PI-Intron12  
Consensus  
911 920 930 940 950 960 970 980 990 1000 1010 1020 1030 1040  
PII-Intron12  
PI-Intron12  
Consensus  
1041 1050 1060 1070 1080 1090 1100 1110 1120 1130 1140 1150 1160 1170  
PII-Intron12  
PI-Intron12  
Consensus  
1171 1180 1190 1200 1210 1220 1230 1240 1250 1260 1270 1280 1290 1300  
PII-Intron12  
PI-Intron12  
Consensus  
1301 1310 1320 1330 1340 1350 1360 1370 1380 1390 1400 1410 1420 1430  
PII-Intron12  
PI-Intron12  
Consensus  
1431 1440 1450 1460 1470 1480 1490 1500 1510 1520 1530 1540 1550 1560  
PII-Intron12  
PI-Intron12  
Consensus  
1561 1570 1580 1590 1600 1610 1620 1630 1640 1650 1660 1670 1680 1690  
PII-Intron12  
PI-Intron12  
Consensus  
1691 1700 1710 1720 1730 1740 1750 1760 1770 1780 1790 1800 1810 1820  
PII-Intron12  
PI-Intron12  
Consensus  
1821 1830 1840 1850 1860 1870 1880 1890 1900 1910 1920 1930 1940 1950  
PII-Intron12  
PI-Intron12  
Consensus  
1951 1960 1970 1980 1990 2000 2010 2020 2030 2040 2050 2060 2070 2080  
PII-Intron12  
PI-Intron12  
Consensus  
2081 2090 2100 2110 2120 2130 2134  
PII-Intron12  
PI-Intron12  
Consensus

(L)



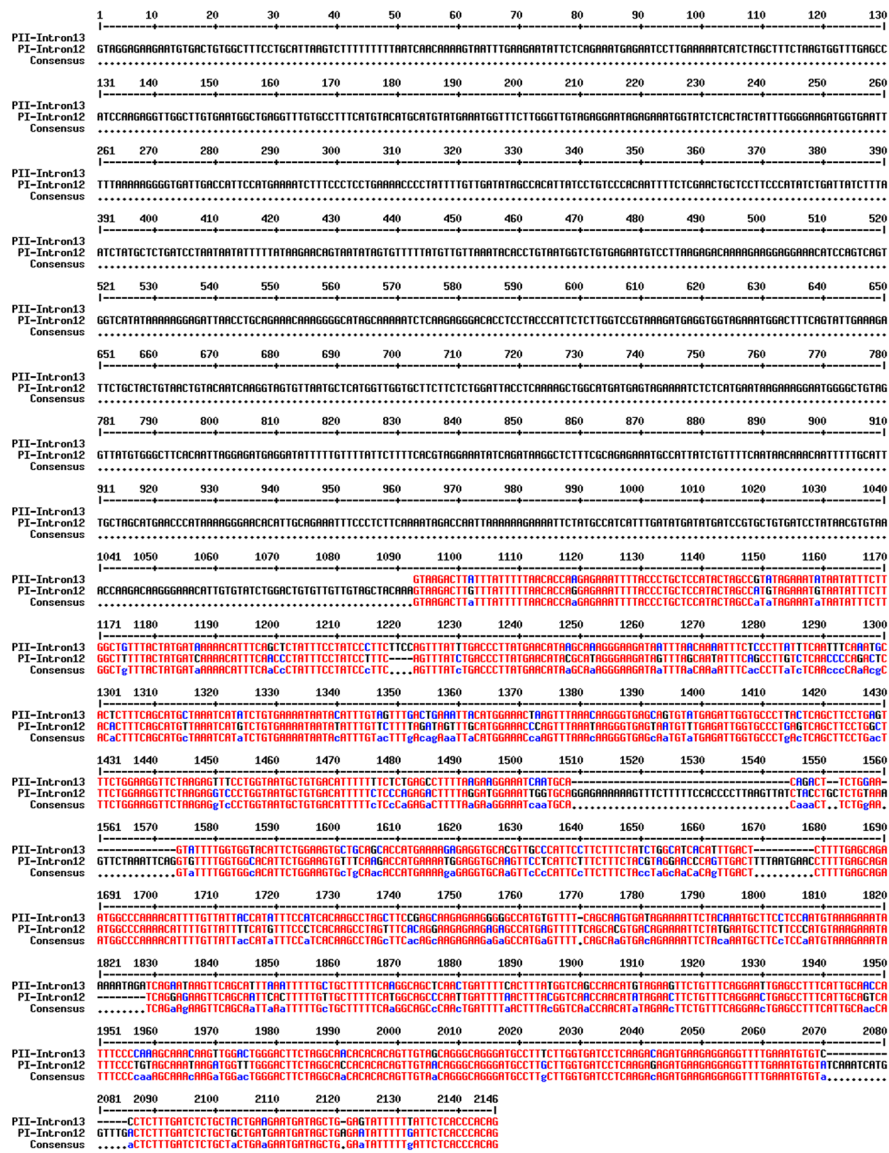

(M)

**Figure S1:** Pairwise nucleotide sequence alignments of topologically equivalent paralog introns 1–12 from Pre-pro EOC0006-like PII-SVMP and 1–13 from Pre-pro EOC0028-like PI-SVMP gene sequences.
